# Supplementary material for: Ultrafine ZnSe/CoSe nanodots encapsulated in core–shell MOF-derived hierarchically porous N-doped carbon nanotubes for superior lithium/sodium storage
Source: Royal Society of Chemistry journal article supplement (doi:10.1039/d2ta09445b), 2023-01-01
Supplement: d2ta09445b1.pdf [file d2ta09445b1.pdf]

## Electronic Supplementary Information

### **Ultrafine ZnSe/CoSe Nanodots Encapsulated in Core-shell MOFs-Derived Hierarchically Porous N-doped Carbon Nanotubes for Superior Lithium/Sodium Storage**

Qiang Zhang<sup>a</sup>, Meng-Li Chen<sup>a</sup>, Jin Wang<sup>b</sup>, Chen-Fan Zhao<sup>a</sup>, Fu-Hu Cao<sup>a</sup>, Hao Li<sup>c</sup>, Huai-Ping Cong<sup>a</sup>, and Chuan-Ling Zhang<sup>\*a</sup>

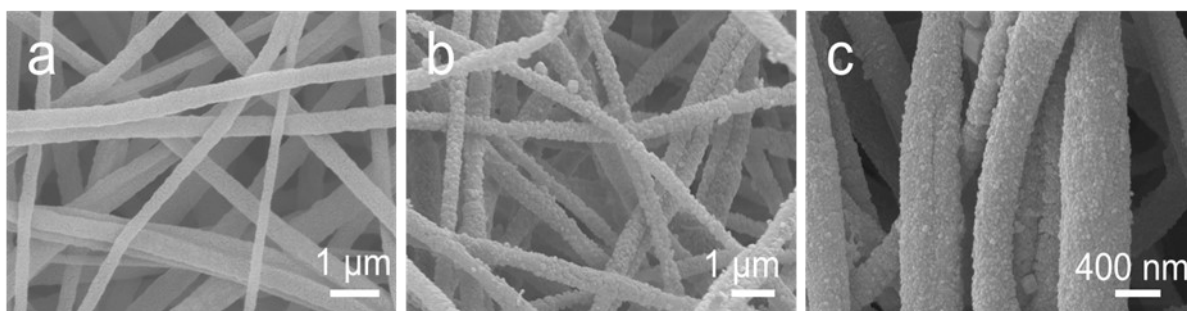

**Figure S1.** SEM images of (a) ES-Zn(CH<sub>3</sub>COO)<sub>2</sub>, (b) PAN@ZIF-8, and (c) PAN@ZIF-8@ZIF-67, respectively.

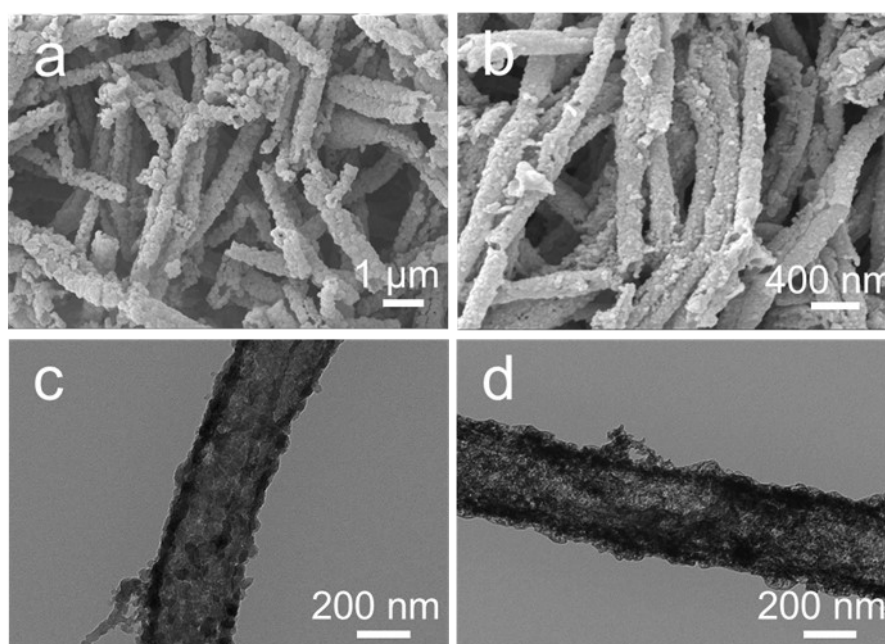

**Figure S2.** SEM and TEM images of (a, c) ZIF-8@ZIF-67 and (b, d) ZnSe@CoSe.

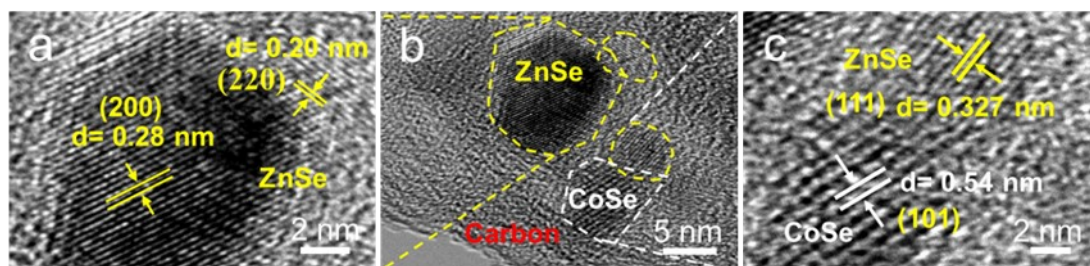

**Figure S3.** HRTEM images of ZnSe@CoSe@CN.

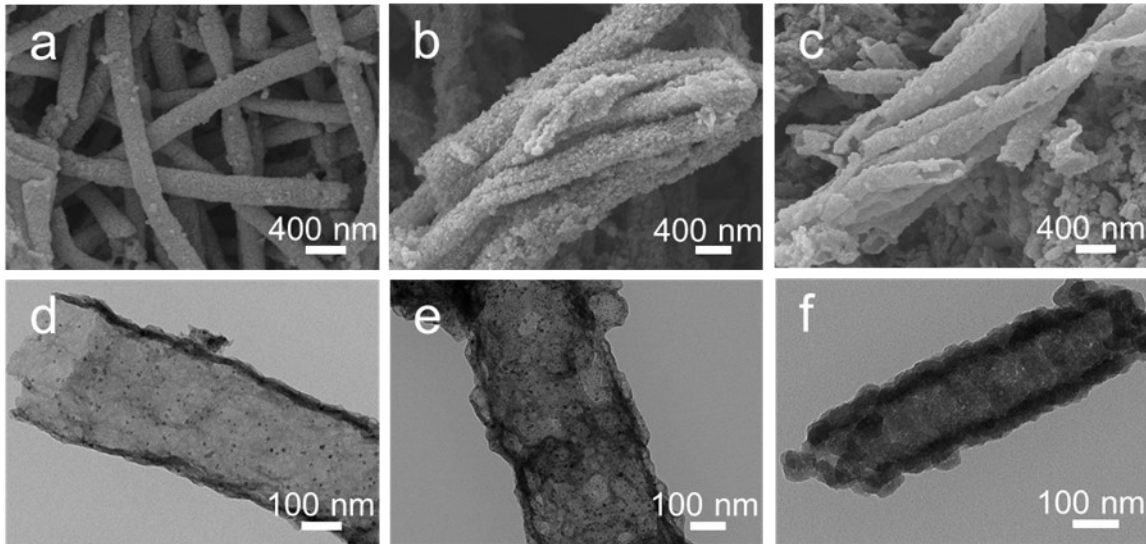

**Figure S4.** SEM and TEM images of (a, d) ZnSe@CN, (b, e) CoSe@CN, and (c, f) Zn@Co@CN, respectively.

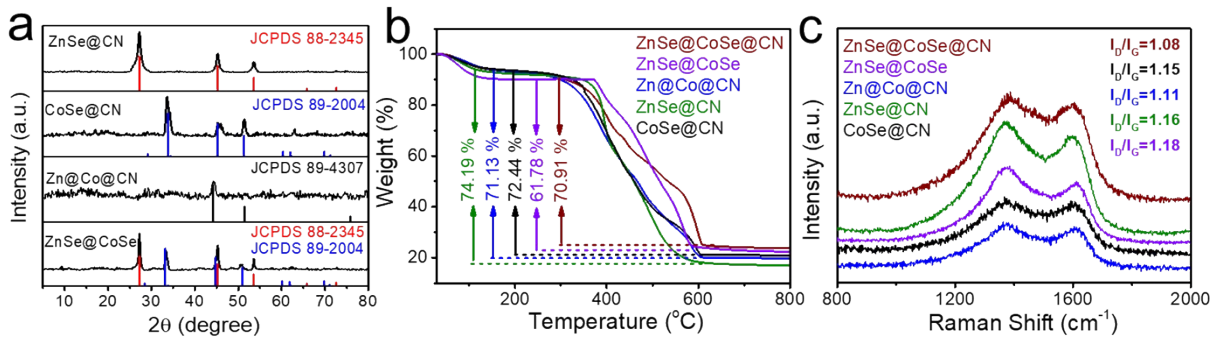

**Figure S5.** (a) Powder XRD patterns, (b) TGA curves, and (c) Raman spectra of the samples, respectively.

The TGA curves were characterized under the air atmosphere with the temperature ranging from 30 to 800 °C at a heating rate of 10 °C min<sup>-1</sup>. It can be observed that when the temperature range was between 30 and 200 °C, the samples have initial marginal weight loss, which is due to the evaporation of free water and physically adsorbed water in the material during the temperature rise, resulting in the quality reduction. Besides, there is a slight mass increase at about 270 °C, which is due to the presence of SeO<sub>2</sub> during the phase transition from selenide to oxide in the material, as shown below:

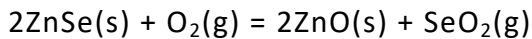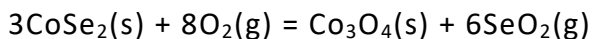

Finally, the severe mass loss of materials from 300 °C to 600 °C can be attributed to the reaction of N-doped carbonaceous components with oxygen, the generation of carbon dioxide gas, and the evaporation of the formed SeO<sub>2</sub> at lower temperatures. According to the above formula and the mass loss, the contents of the N-doped carbon in the samples of ZnSe@CoSe@CN, ZnSe@CN, CoSe@CN, Zn@Co@CN, and ZnSe@CoSe were 70.91%, 74.19%, 72.44%, 56.66%, and 61.76%, respectively.

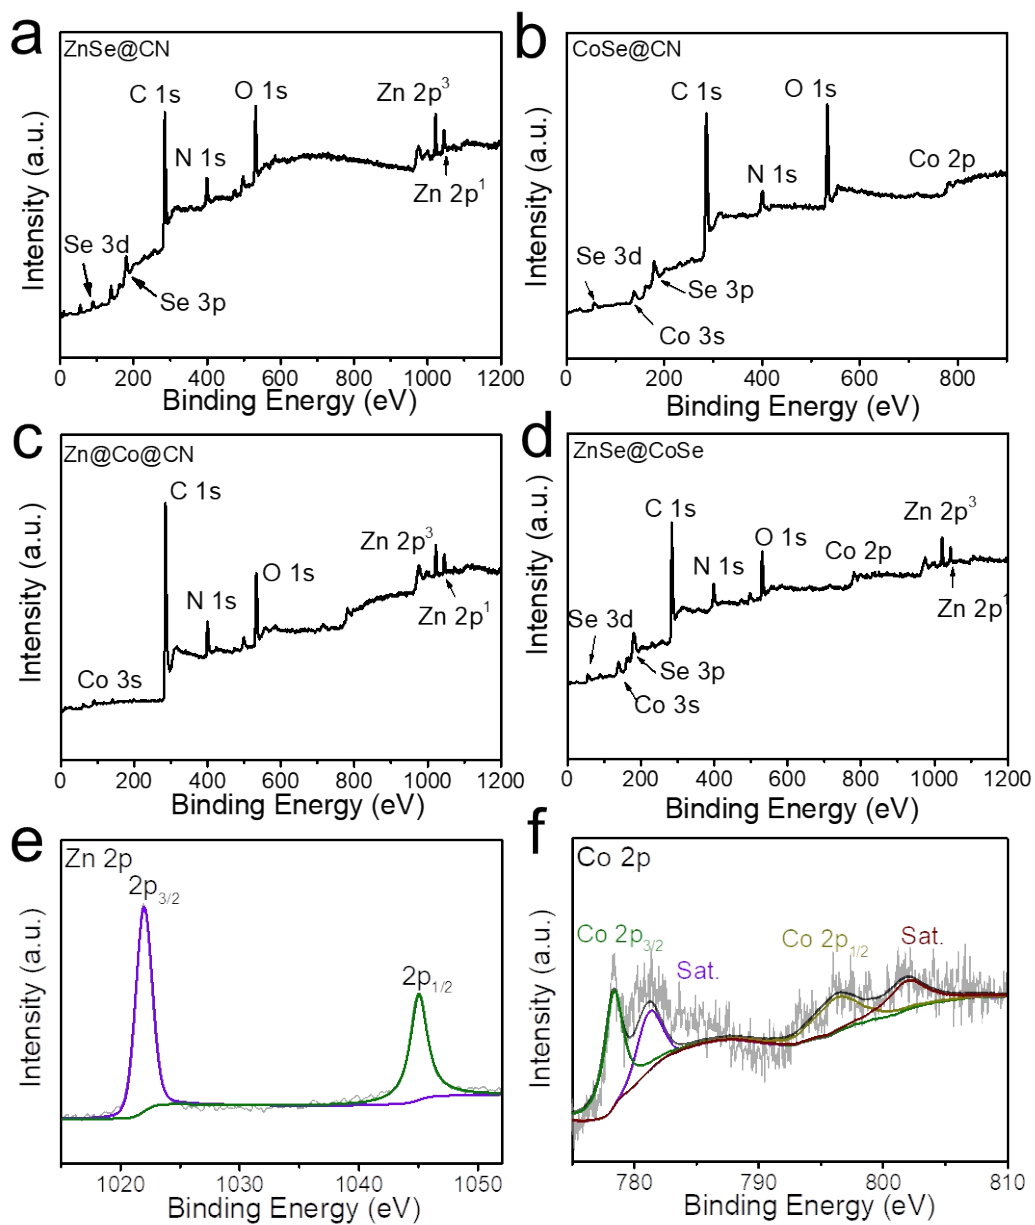

**Figure S6.** XPS survey spectra of (a) ZnSe@CN, (b) CoSe@CN, (c) Zn@Co@CN, and (d) ZnSe@CoSe, respectively. High-resolution XPS spectra of (e) Zn 2p of ZnSe@CN and (f) Co 2p of CoSe@CN.

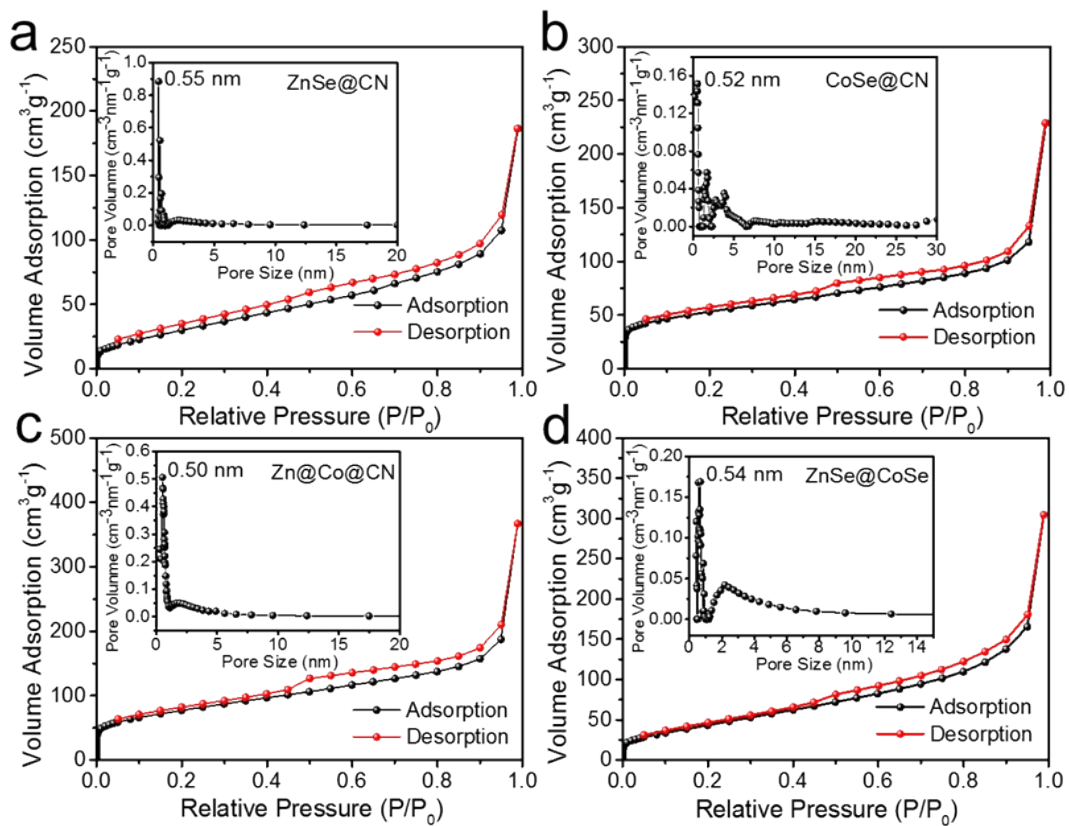

**Figure S7.**  $N_2$  sorption isotherms of (a) ZnSe@CN, (b) CoSe@CN, (c) Zn@Co@CN, and (d) ZnSe@CoSe, respectively. Inset is the corresponding pore size distribution.



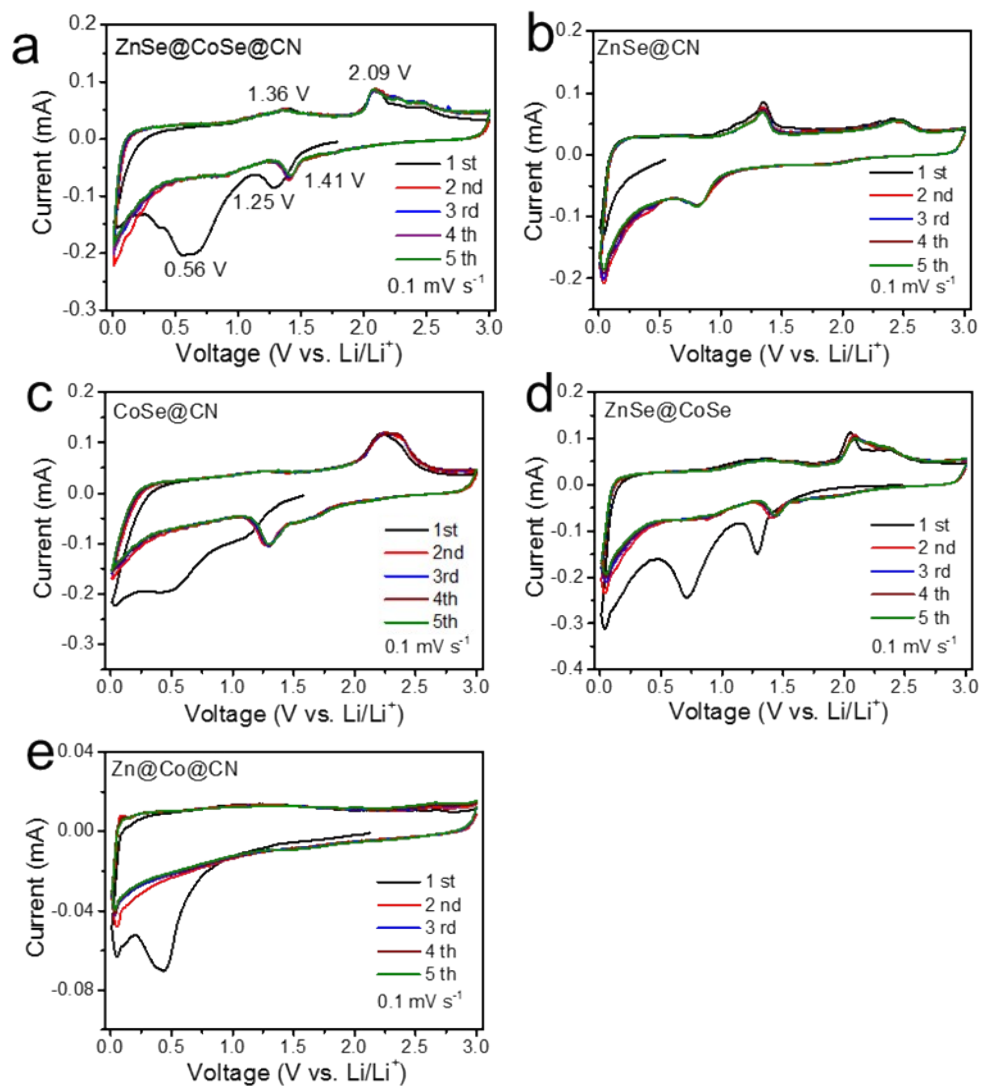

**Figure S8.** CV profiles of the anodes with a scanning rate of  $0.1 \text{ mV s}^{-1}$  for lithium-ion storage.

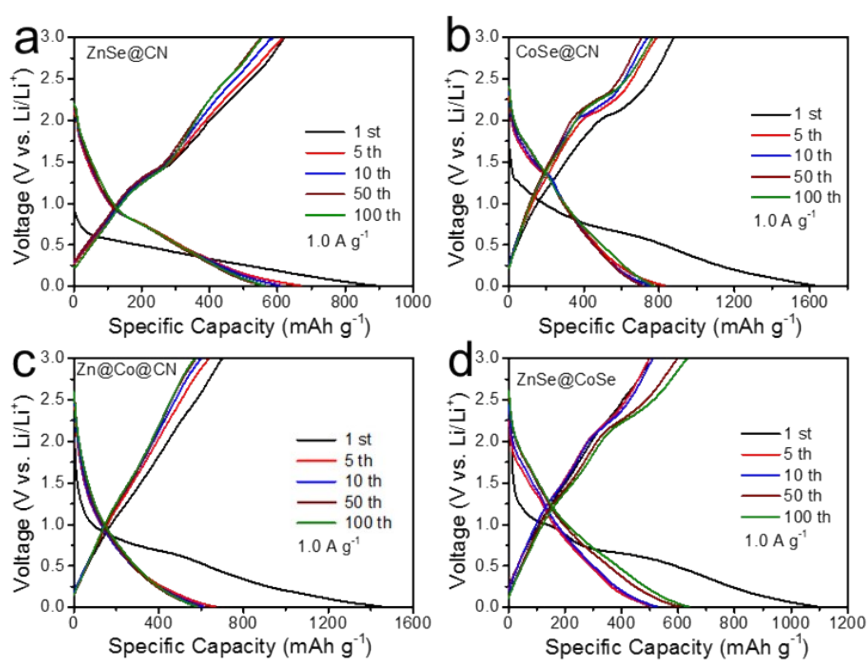

**Figure S9.** GDC profiles of the contrast anodes at  $1.0 \text{ A g}^{-1}$  for lithium-ion storage.

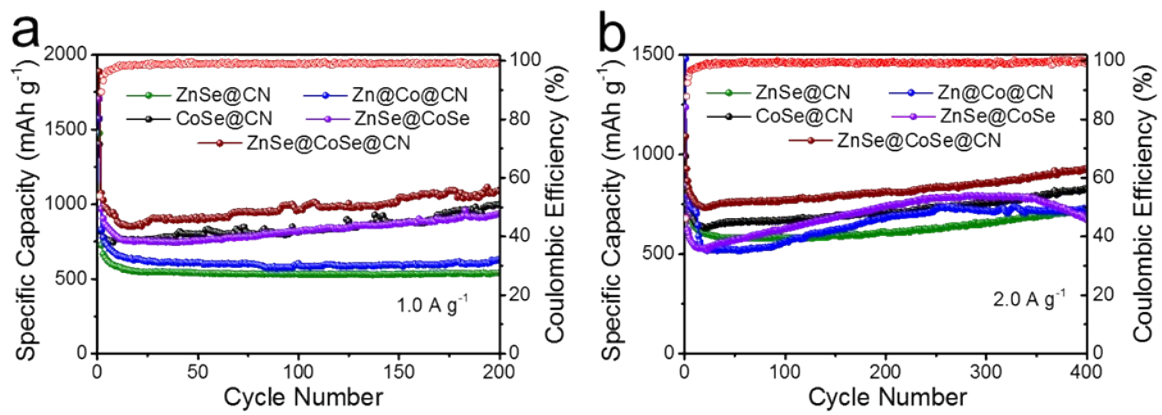

**Figure S10.** Cycling performance of the anodes at (a) 1.0 A g<sup>-1</sup> and (b) 2.0 A g<sup>-1</sup> for lithium-ion storage.

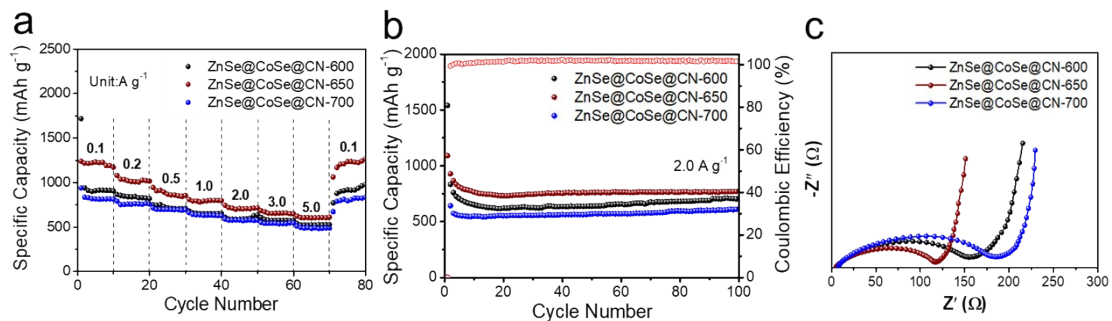

**Figure S11.** (a) Rate performance, (b) cycling performance, and (c) Nyquist plots of the ZnSe@CoSe@CN anodes prepared at different pyrolysis temperatures for lithium-ion storage.

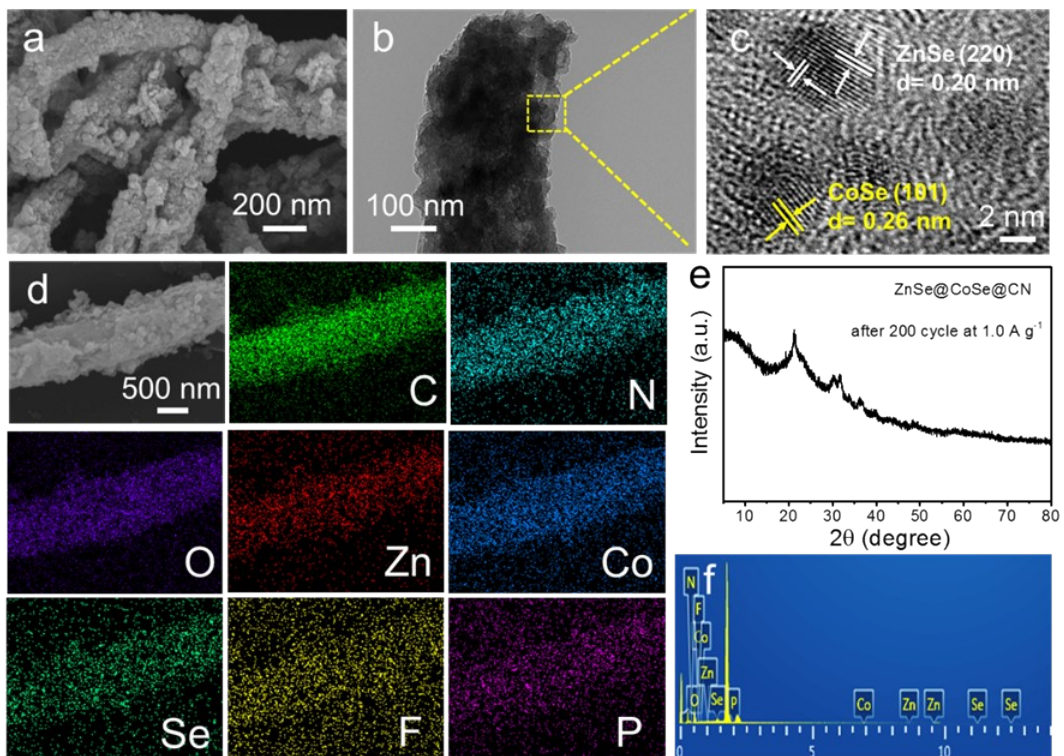

**Figure S12.** (a) SEM, (b) TEM, (c) HRTEM, (d) elemental mapping images, (e) XRD pattern, and (f) EDS pattern of the ZnSe@CoSe@CN anode after 200 cycles at  $1.0 \text{ A g}^{-1}$ , respectively.

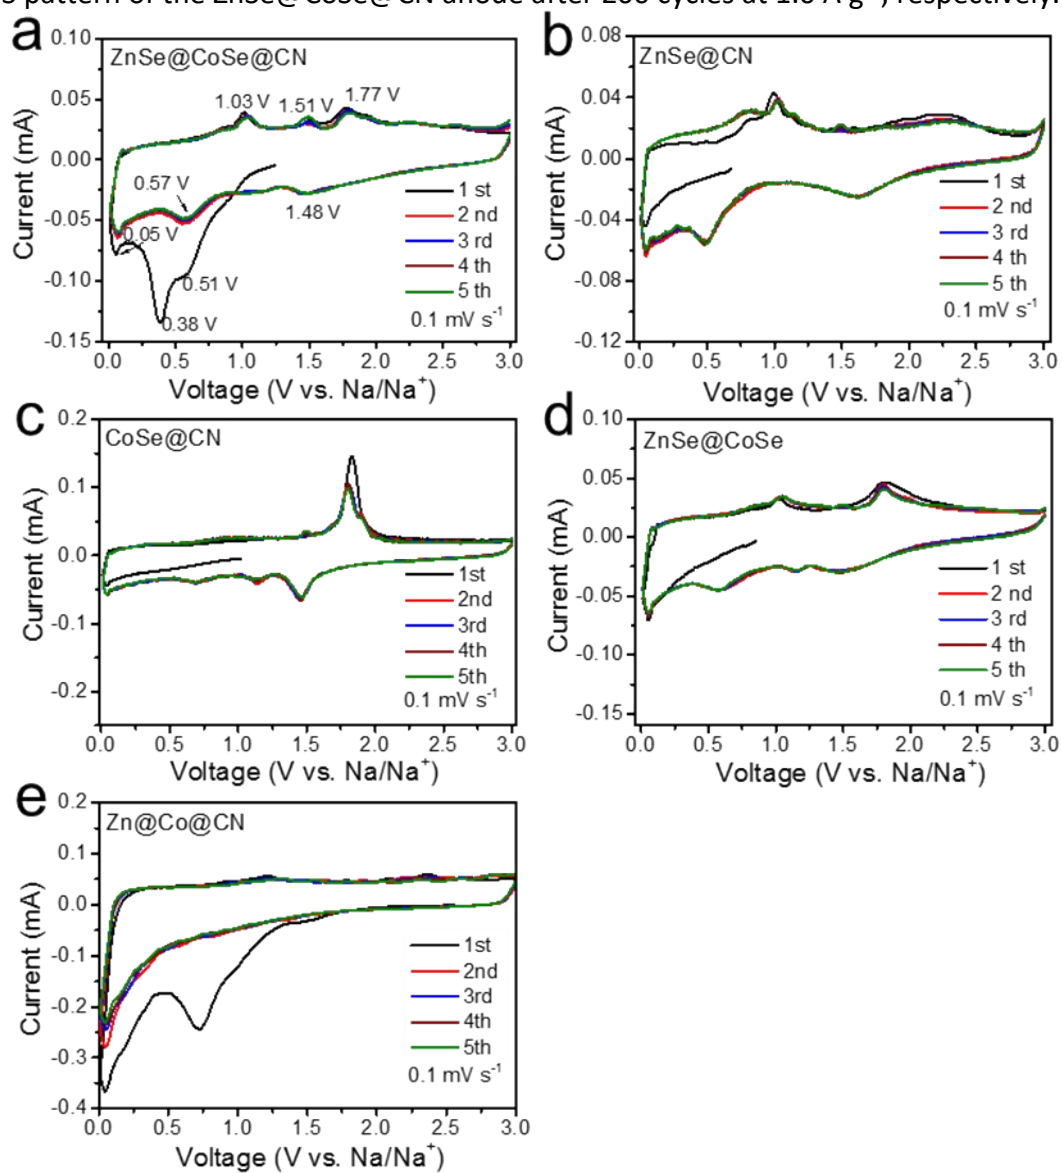

**Figure S13.** CV profiles of the anodes with a scanning rate of  $0.1 \text{ mV s}^{-1}$  for sodium-ion storage.



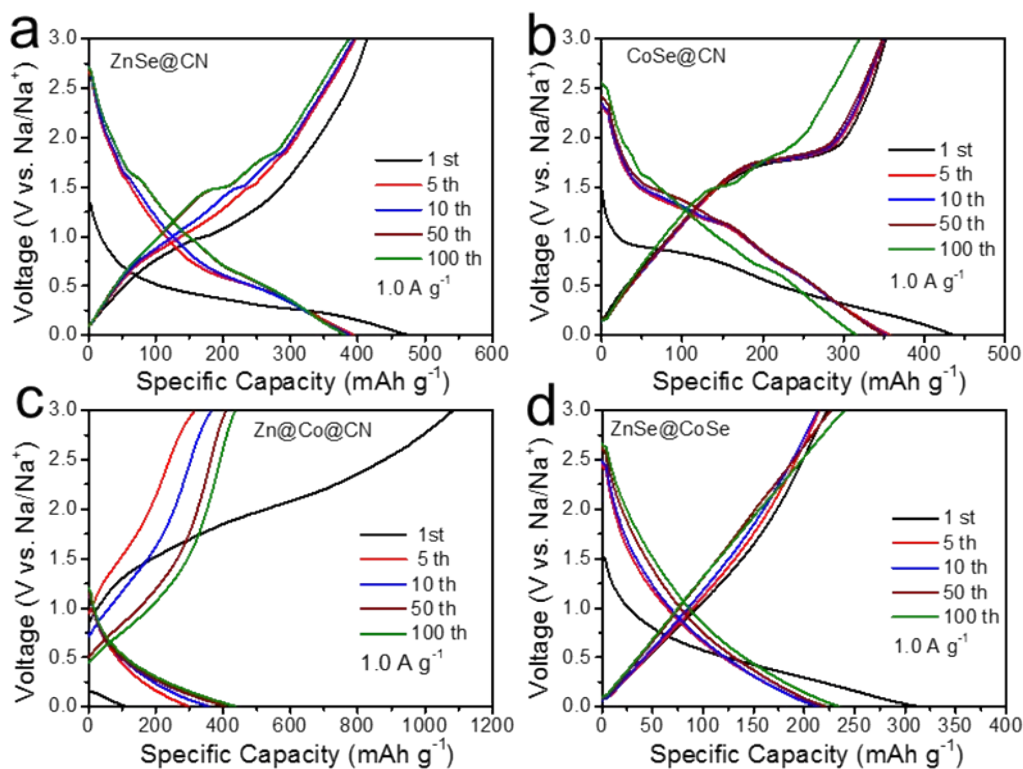

**Figure S14.** GDC profiles of (a) ZnSe@CN, (b) CoSe@CN, (c) Zn@Co@CN, and (d) ZnSe@CoSe for sodium-ion storage, respectively.

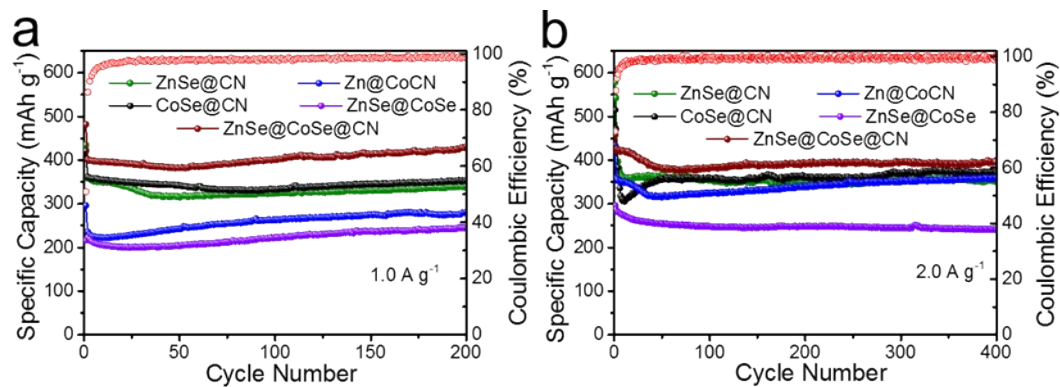

**Figure S15.** Cycling performance of the anodes at (a) 1.0 A g<sup>-1</sup> and (b) 2.0 A g<sup>-1</sup> for sodium-ion storage.

**Table S1.** XPS measured element contents of the samples.

| Samples      | C[atomic%] | N[atomic%] | O[atomic%] | Co[atomic%] | Zn[atomic%] | Se[atomic%] |
|--------------|------------|------------|------------|-------------|-------------|-------------|
| ZnSe@CN      | 68.98      | 9.64       | 16.46      | —           | 2.26        | 2.74        |
| CoSe@CN      | 68.47      | 8.05       | 19.31      | 1.69        | —           | 2.47        |
| Zn@Co@CN     | 75.82      | 9.4        | 12.57      | 1.06        | 1.11        | —           |
| ZnSe@CoSe    | 68.99      | 11.06      | 13.06      | 1.8         | 1.68        | 3.41        |
| ZnSe@CoSe@CN | 72         | 10.55      | 11.87      | 1.14        | 1.15        | 3.29        |

**Table S2.** The specific surface area and total pore volume of the samples.

| Samples      | Surface area<br>( $\text{m}^2\cdot\text{g}^{-1}$ ) | Total pore volume<br>( $\text{cm}^3\cdot\text{g}^{-1}$ ) |
|--------------|----------------------------------------------------|----------------------------------------------------------|
| ZnSe@CN      | 120.61                                             | 2.892                                                    |
| CoSe@CN      | 143.89                                             | 3.555                                                    |
| Zn@Co@CN     | 275.49                                             | 5.693                                                    |
| ZnSe@CoSe    | 191.267                                            | 4.724                                                    |
| ZnSe@CoSe@CN | 168.81                                             | 4.454                                                    |

**Table S3.** Electrochemical performances of the anode materials for lithium-ion storage.

|                           | Materials                                      | Current density (mAh g <sup>-1</sup> ) | Initial Discharge Capacity (mAh g <sup>-1</sup> ) / Initial Charge Capacity (mAh g <sup>-1</sup> ) | ICE(%)       | Reversible Capacity (mAh g <sup>-1</sup> )                     | Reference        |
|---------------------------|------------------------------------------------|----------------------------------------|----------------------------------------------------------------------------------------------------|--------------|----------------------------------------------------------------|------------------|
|                           |                                                |                                        |                                                                                                    |              | after (Cycle number) at current density (mAh g <sup>-1</sup> ) |                  |
| <b>Performance of LIB</b> | <b>ZnSe@CoSe@CN</b>                            | <b>100</b>                             | <b>2839 / 1443</b>                                                                                 | <b>50.84</b> | <b>1567 (100) (100)</b>                                        | <b>This work</b> |
|                           |                                                | <b>1000</b>                            | <b>1887 / 1016</b>                                                                                 | <b>53.85</b> | <b>1087 (200) (1000)</b>                                       |                  |
|                           |                                                | <b>2000</b>                            | <b>1091 / 604</b>                                                                                  | <b>55.2</b>  | <b>870 (400) (2000)</b>                                        |                  |
|                           |                                                | <b>5000</b>                            | <b>1255 / 641</b>                                                                                  | <b>51.1</b>  | <b>568 (1000) (5000)</b>                                       |                  |
|                           | ZCS@NC/CNTs                                    | 100                                    | 1182 / 691                                                                                         | 58.4         | 873 (500) (500)<br>406 (1000) (1000)                           | [S1]             |
|                           | CoSe <sub>2</sub> -decorated NbSe <sub>2</sub> | 100                                    | 1187 / 665                                                                                         | 56           | 364 (1500) (5000)                                              | [S2]             |
|                           | ZnSe/CoSe <sub>2</sub> @N-C                    | 100                                    | 1274 / 866                                                                                         | 67.9         | 436 (113) (2000)<br>966 (500) (2000)                           | [S3]             |
|                           | CoSe <sub>2</sub> @C/CNTs                      | 1000                                   | 687 / 562                                                                                          | 81.8         | 606 (100) (100)<br>428 (500) (1000)                            | [S4]             |
|                           | ZnSe/CoSe/NC DPH                               | 100                                    | 1616 / 977                                                                                         | 60.4         | 1216(100) (100)<br>515 (100) (1000)                            | [S5]             |
|                           | ZnSe@C                                         | 100                                    | 869 / 660                                                                                          | 75.9         | 712 (100) (100)<br>617 (800) (1000)<br>472 (800) (2000)        | [S6]             |
|                           | ZnCoO/C (2:1)                                  | 100                                    | 1371 / 1206                                                                                        | 88           | 1050 (300) (100)<br>711 (500) (1000)                           | [S7]             |
|                           | HCN                                            | 200                                    | 1350 / 806                                                                                         | 58.2         | 963 (100) (200)<br>561 (1000) (1000)<br>374 (5000) (5000)      | [S8]             |

**Table S4.** Electrochemical performances of the anode materials for sodium-ion storage.

|                                      | Materials                                            | Current density (A g <sup>-1</sup> ) | Initial Discharge Capacity (mAh g <sup>-1</sup> ) / Initial Charge Capacity (mAh g <sup>-1</sup> ) | ICE(%)           | Reversible Capacity (mAh g <sup>-1</sup> ) after (Cycle number) at current density (A g <sup>-1</sup> ) | reference        |
|--------------------------------------|------------------------------------------------------|--------------------------------------|----------------------------------------------------------------------------------------------------|------------------|---------------------------------------------------------------------------------------------------------|------------------|
| <b>Performance of SIB</b>            | <b>ZnSe@CoSe@CN</b>                                  | <b>0.1</b>                           | <b>660 / 559</b>                                                                                   | <b>84.6</b>      | <b>591(100) (0.1)</b>                                                                                   | <b>This work</b> |
|                                      |                                                      | <b>1.0</b>                           | <b>481 / 245</b>                                                                                   | <b>50.92</b>     | <b>431 (200) (1.0)</b>                                                                                  |                  |
|                                      |                                                      | <b>2.0</b>                           | <b>457 / 335</b>                                                                                   | <b>73.18</b>     | <b>397 (400) (2.0)</b>                                                                                  |                  |
|                                      |                                                      | <b>5.0</b>                           | <b>587 / 499</b>                                                                                   | <b>85</b>        | <b>390 (1000) (5.0)</b>                                                                                 |                  |
|                                      | <b>ZnSe/CoSe<sub>2</sub>/C</b>                       | 0.2                                  | 846 / 475                                                                                          | 56.1             | 475 (120) (0.2)                                                                                         | [S9]             |
|                                      |                                                      |                                      |                                                                                                    |                  | 363 (400) (1.0)                                                                                         |                  |
|                                      |                                                      |                                      |                                                                                                    |                  | 239 (500) (5.0)                                                                                         |                  |
|                                      | <b>ZnSe/2(CoSe<sub>2</sub>)/NC</b>                   | 0.1                                  | 857 / 537                                                                                          | 62.7             | 552 (100) (0.1)                                                                                         | [S10]            |
|                                      |                                                      |                                      |                                                                                                    |                  | 395 (500) (1.0)                                                                                         |                  |
|                                      | <b>In<sub>2</sub>Se<sub>3</sub>/CoSe<sub>2</sub></b> | 0.1                                  | 827 / 506                                                                                          | 61.2             | 445 (200) (0.5)                                                                                         | [S11]            |
|                                      |                                                      |                                      |                                                                                                    |                  | 297 (2000) (5.0)                                                                                        |                  |
|                                      | <b>NCNF@MoSSe</b>                                    | 1.0                                  | 823 / 495                                                                                          | 60.1             | 416 (100) (1.0)                                                                                         | [S12]            |
|                                      |                                                      |                                      |                                                                                                    |                  | 323 (700) (2.0)                                                                                         |                  |
|                                      | <b>CNT/CoSe<sub>2</sub>/C</b>                        | 0.1                                  | 952 / 544                                                                                          | 57.1             | 531 (100) (0.1)                                                                                         | [S13]            |
|                                      |                                                      |                                      |                                                                                                    |                  | 396 (300) (0.5)                                                                                         |                  |
|                                      | <b>HCN</b>                                           | 0.1                                  | 504 / 340                                                                                          | 67.5             | 351 (500) (0.1)                                                                                         | [S8]             |
| 213 (1000) (1.0)                     |                                                      |                                      |                                                                                                    |                  |                                                                                                         |                  |
| 154 (1000) (5.0)                     |                                                      |                                      |                                                                                                    |                  |                                                                                                         |                  |
| <b>ZnSe@N-C@MoSe<sub>2</sub>/rGO</b> | 1.0                                                  | 675 / 350                            | 51.85                                                                                              | 319 (1800) (1.0) | [S14]                                                                                                   |                  |
|                                      |                                                      |                                      |                                                                                                    | 301 (1100) (2.0) |                                                                                                         |                  |
|                                      |                                                      |                                      |                                                                                                    | 238 (1500) (5.0) |                                                                                                         |                  |
| <b>CoSe<sub>2</sub>/CNFs</b>         | 0.2                                                  | 972 / 516                            | 53                                                                                                 | 430 (400) (0.2)  | [S15]                                                                                                   |                  |
|                                      |                                                      |                                      |                                                                                                    | 370 (1000) (2.0) |                                                                                                         |                  |
| <b>MoSe<sub>2</sub>@CoSe/N-C</b>     | 0.1                                                  | 557 / 452                            | 81.1                                                                                               | 485 (100) (0.1)  | [S16]                                                                                                   |                  |
|                                      |                                                      |                                      |                                                                                                    | 347 (300) (2.0)  |                                                                                                         |                  |
| <b>Zn-Co-Se@NDC</b>                  | 0.2                                                  | 550 / 506                            | 87                                                                                                 | 446 (200) (0.2)  | [S17]                                                                                                   |                  |
|                                      |                                                      |                                      |                                                                                                    | 344 (2000) (5.0) |                                                                                                         |                  |

## References

- [S1] J. Jin, Y. Zheng, L. B. Kong, N. Srikanth, Q. Y. Yan and K. Zhou, *J. Mater. Chem. A*, 2018, **6**, 15710-15717.
- [S2] J. L. Zhang, C. F. Du, J. Zhao, H. Ren, Q. H. Liang, Y. Zheng, S. Madhavi, X. Wang, J. W. Zhu and Q. Y. Yan, *ACS Appl. Mater. Interfaces*, 2018, **10**, 37773-37778.
- [S3] Q. Liu, J. G. Hou, Q. Hao, P. Huang, C. X. Xu, Q. X. Zhou, J. Zhou and H. Liu, *Nanoscale*, 2020, **12**, 22778-22786.
- [S4] J. Yang, H. Gao, S. Men, Z. Shi, Z. Lin, X. Kang and S. Chen, *Adv. Sci.*, 2018, **5**, 1800763.
- [S5] H. D. Liu, Y. Lin, M. N. Li, L. Zhang, Y. Lu and W. Xiao, *Int. J. Hydrog. Energy*, 2021, **46**, 30818-30827.
- [S6] D. J. Ma, Q. L. Zhu, X. T. Li, H. C. Gao, X. F. Wang, X. W. Kang and Y. Tian, *ACS Appl. Mater. Interfaces*, 2019, **11**, 8009-8017.
- [S7] B. Joshi, E. Samuel, Y. I. Kim, G. Periyasami, M. Rahaman and S. S. Yoon, *J. Mater. Sci Technol.*, 2021, **67**, 116-126.
- [S8] Z. Zhang, Y. Huang, X. Li, S. Zhang, Q. X. Jia and T. H. Li, *Chem. Eng. J.*, 2021, **421**, 129827.
- [S9] S. Y. Jeong and J. S. Cho, *Nanomaterials Basel*, 2019, **9**, 1362.
- [S10] P. Liu, J. Han, K. Zhu, Z. Dong and L. Jiao, *Adv. Energy Mater.*, 2020, **10**, 2000741.
- [S11] S. H. Xiao, X. Y. Li, W. S. Zhang, Y. Xiang, T. S. Li, X. B. Niu, J. S. Chen and Q. Y. Yan, *ACS Nano*, 2021, **15**, 13307-13318.
- [S12] J. W. Shi, H. Li, Y. W. Liu, Q. Y. Lu and F. Gao, *Adv. Mater. Interfaces*, 2022, **9**, 2102408.
- [S13] M. Yousaf, Y. J. Chen, H. Tabassum, Z. P. Wang, Y. S. Wang, A. Y. Abid, A. Mahmood, N. Mahmood, S. J. Guo, R. P. S. Han and P. Gao, *Adv. Sci.*, 2020, **7**, 1902907.
- [S14] N. X. Shi, Y. T. Chu, B. J. Xi, M. Huang, W. H. Chen, B. Duan, C. H. Zhang, J. K. Feng and S. L. Xiong, *Adv. Energy Mater.*, 2020, **10**, 2002298.
- [S15] H. Yin, H. Q. Qu, Z. T. Liu, R. Z. Jiang, C. Li and M. Q. Zhu, *Nano Energy*, 2019, **58**, 715-723.
- [S16] J. Chen, A. Q. Pan, Y. P. Wang, X. X. Cao, W. C. Zhang, X. Z. Kong, Q. Su, J. D. Lin, G. Z. Cao and S. Q. Liang, *Energy Stor. Mater.*, 2019, **21**, 97-106.
- [S17] J. Feng, S. H. Luo, S. X. Yan, Y. Zhan, Q. Wang, Y. H. Zhang, X. Liu and L. J. Chang, *Small*, 2021, **17**, 2101887.
